# Supplementary material for: One-pot Suzuki–Heck relay to prepare industrially valuable intermediates using the Pd–Cy*Phine catalyst system
Source: Royal Society of Chemistry journal article supplement (doi:10.1039/c7cy01344b), 2017-01-01
Supplement: c7cy01344b1.pdf [file c7cy01344b1.pdf]

## Electronic Supplementary Information for:

### One-pot Suzuki-Heck relay to prepare industrially valuable intermediates using the Pd-Cy\*Phine catalyst system

Uttam K. Das,<sup>a</sup> Roxanne Clément,<sup>a</sup> Charles W. Johannes,<sup>b</sup> Edward G. Robins,<sup>c</sup> Howard Jong\*,<sup>b</sup> and R. Tom Baker\*,<sup>a</sup>

<sup>a</sup> Department of Chemistry and Biomolecular Sciences and Centre for Catalysis Research and Innovation, University of Ottawa, Ottawa, Ontario K1N 6N5, Canada. Email: rbaker@uottawa.ca

<sup>b</sup> Organic Chemistry, Institute of Chemical & Engineering Sciences (ICES), Agency for Science, Technology and Research (A\*STAR), 8 Biomedical Grove Neuros #07-01, Singapore 138665. Email: howard\_jong@ices.a-star.edu.sg

<sup>c</sup> Singapore Bioimaging Consortium (SBIC), Agency for Science, Technology and Research (A\*STAR), 11 Biopolis Way, Helios, #02-02, Singapore 138667

## Table of Contents

|                                                                                              |     |
|----------------------------------------------------------------------------------------------|-----|
| Experimental .....                                                                           | S2  |
| General methods and materials .....                                                          | S2  |
| General procedure for Suzuki coupling .....                                                  | S2  |
| <b>Figure S1.</b> Results of product yields for Suzuki reaction with <b>3a</b> (HTS 1) ..... | S5  |
| <b>Table S1:</b> Product yields for Suzuki coupling of <b>3a</b> .....                       | S6  |
| <b>Figure S2.</b> Results of product yields for Suzuki reaction with <b>3b</b> (HTS 1) ..... | S7  |
| <b>Table S2:</b> Product yields for Suzuki coupling of <b>3b</b> .....                       | S8  |
| General procedure for one-pot Suzuki-Heck Relay (SHR) reaction .....                         | S9  |
| <b>Table S3:</b> Product yields for Suzuki-Heck relay reaction with <b>3a</b> .....          | S10 |
| <b>Table S4:</b> Conversion values for the Suzuki-Heck relay reaction with <b>3b</b> .....   | S11 |
| Representative procedure for scale-up Suzuki-Heck Relay (SHR) reaction .....                 | S12 |
| NMR spectra of one-pot Suzuki-Heck Relay products .....                                      | S14 |
| References .....                                                                             | S20 |

## Experimental:

**General methods and materials.** All reactions were performed under nitrogen atmosphere in a glovebox. Commercial reagents were purchased from Aldrich and used without further purification; solvents were obtained from a solvent purification system (< 2.0 ppm of H<sub>2</sub>O) and acetonitrile was dried by refluxing over CaH<sub>2</sub>, distilled and further dried over activated Al<sub>2</sub>O<sub>3</sub>. Solid bases and boron reagents were dispensed by Unchained Labs' Freeslate system using the SV-vial technology, with the exception of the vinylboronic anhydride complex, which was weighted out manually; liquid reagents and solutions were dispensed by pipette. Reactions were conducted in 1.2 mL glass shell vials equipped with parylene-coated stir bars in 96-well aluminum plates, which were sealed with a PFA sheet, rubber gasket, and top stainless steel plate. HPLC analysis was performed on an Agilent 1100 system equipped with a DAD detector, GC-FID analysis on an Agilent 6850 instrument, and GC/MS analysis on an Agilent 6890/5975 instrument. <sup>1</sup>H, <sup>13</sup>C and <sup>19</sup>F NMR spectra were recorded on a 400 MHz Bruker Avance instrument at room temperature (21–25°C). NMR spectra were referenced to the residual proton peaks associated with the deuterated solvents (for <sup>1</sup>H NMR, CDCl<sub>3</sub>: 7.26 ppm and for <sup>13</sup>C NMR, CDCl<sub>3</sub>: 77.16 ppm). <sup>19</sup>F NMR spectra were referenced to internal 1,3-bis(trifluoromethyl)benzene (BTB) (Aldrich, 99%, deoxygenated by purging with nitrogen, stored over activated 4 Å molecular sieves), set to –63.5 ppm. For electron impact high-resolution mass spectra (HRMS-EI), solid samples were prepared by drying products under vacuum, and a Kratos Concept S1 (Hres 7000–10000) mass spectrometer was used.

**General procedure for Suzuki coupling:** Substrate concentration was 0.25 M, with 1.2 equivalents of boron coupling reagent (0.4 equivalents for the vinylboronic anhydride complex) and 2.0 equivalents of base. Phenanthrene was used as internal standard, and the catalyst solution was prepared in toluene at room temperature. The plate was sealed and heated/stirred at 90 °C for 12 hours. After cool-down, aliquots of 10 uL were flushed through silica on a multi-well filtration plate with a 50:50 MeCN:MeOH solution to a total volume of about 800 uL.

For Suzuki coupling with methyl-4-chlorobenzoate, samples were analyzed by HPLC [Zorbax Extend C8 column (4.6 x 150 mm), THF:H<sub>2</sub>O 40:60 at 1.5 mL/min, detection at 254 nm, column temperature of 30 °C];

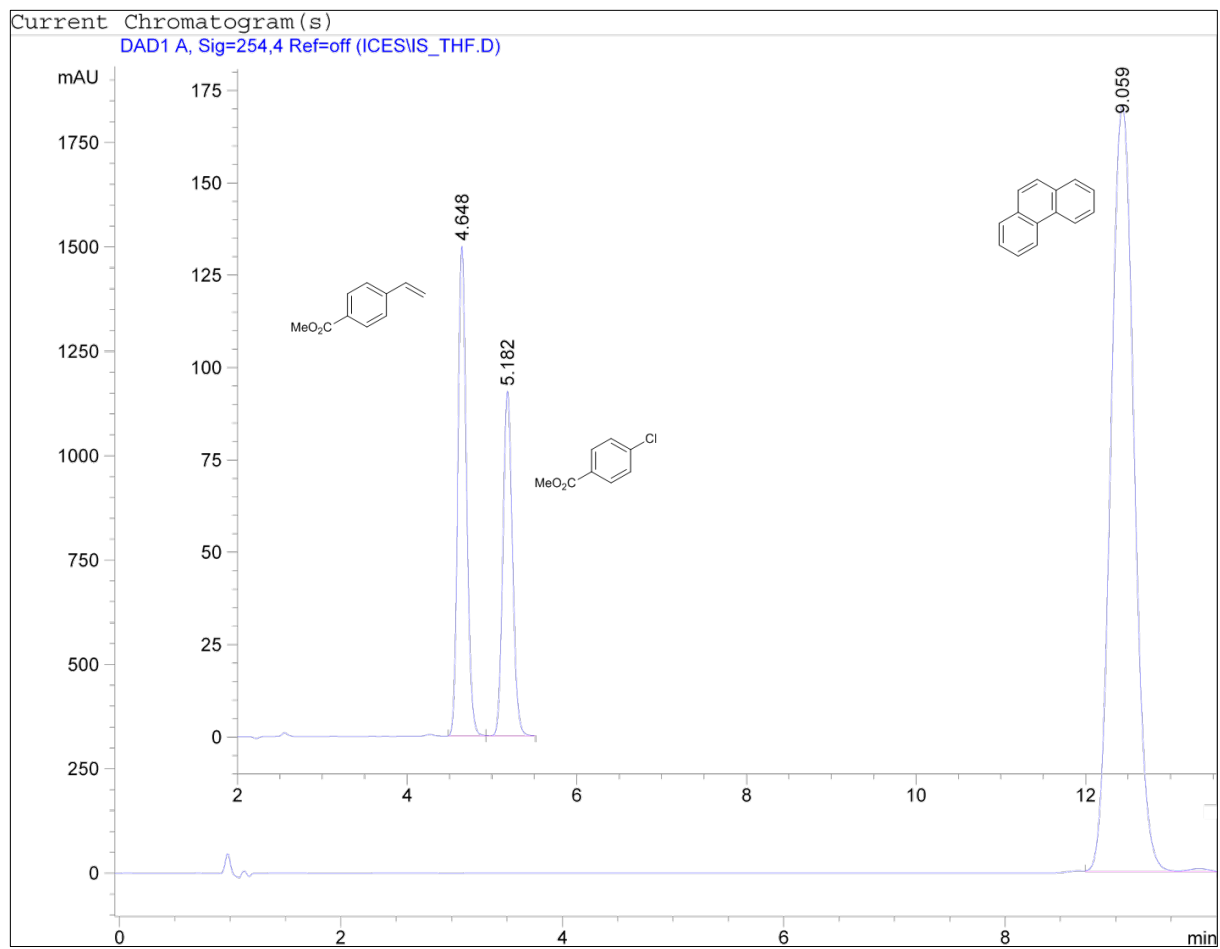

For Suzuki coupling with 5-bromo-1-(tetrahydro-pyran-2-yl)-1*H*-indazole), substrate **4a** was prepared according to a previously reported procedure<sup>1</sup>; samples were analyzed by HPLC [Zorbax Extend C8 column (4.6 x 150 mm), MeCN:H<sub>2</sub>O 50:50 at 1.5 mL/min, detection at 254 nm, column temperature of 30 °C];

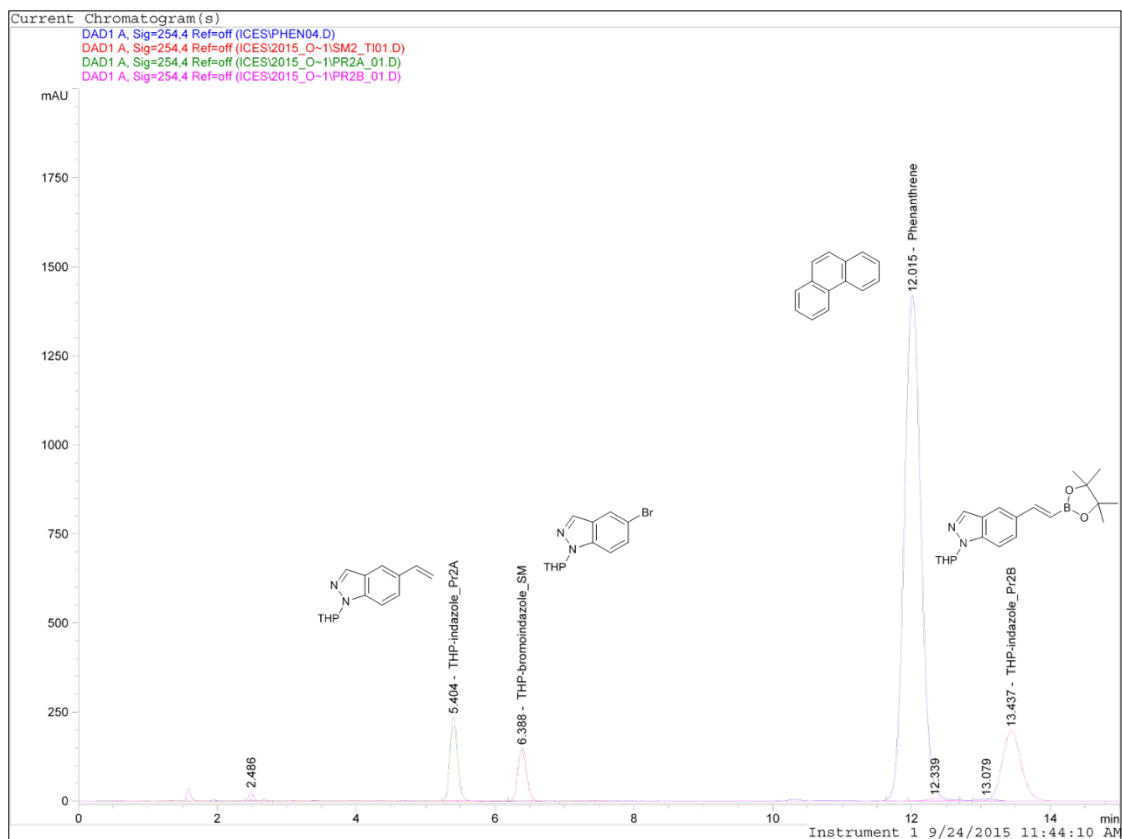

# HTS 1

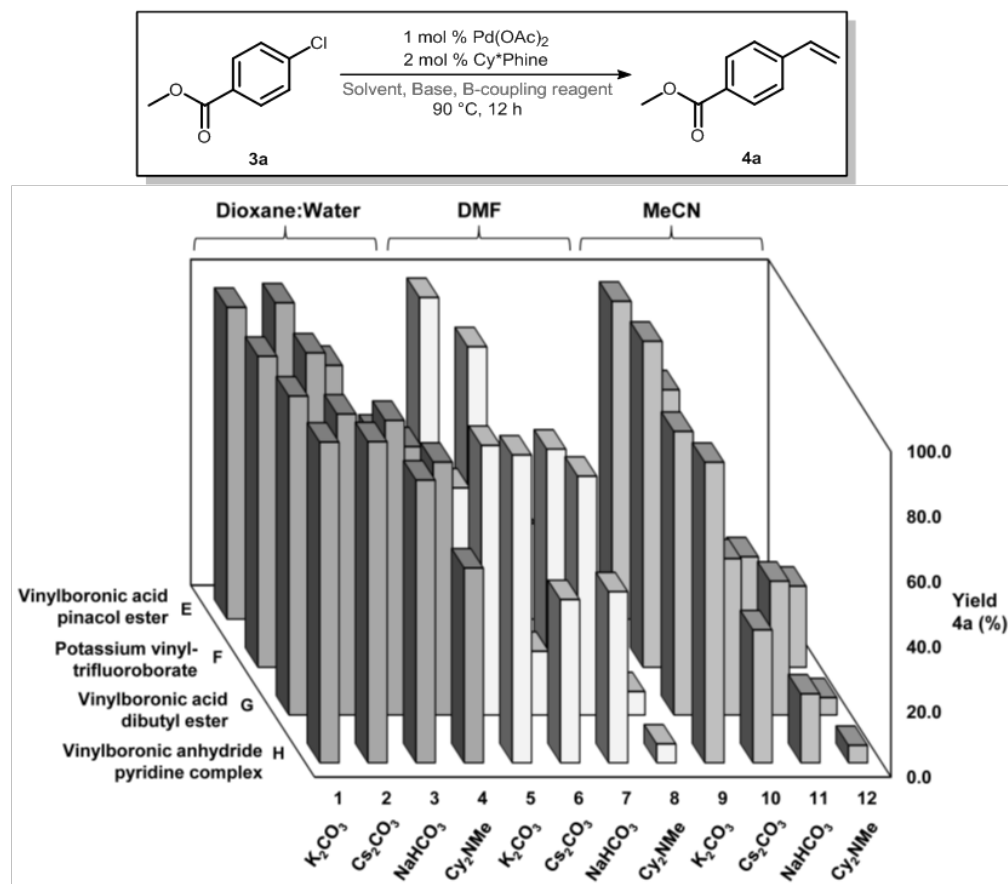

**Figure S1.** Solvent, base and vinylic boron reagent optimization for **HTS 1**. Reaction conditions: **3a** (0.125 mmol), boron reagent (0.150 mmol), base (0.250 mmol), solvent (475  $\mu$ L). Pd-Cy\*Phine catalyst (25  $\mu$ L). Yields were calculated by HPLC using phenanthrene as the internal standard.

**Table S1:** Product yields for Suzuki coupling of methyl-4-chlorobenzoate (**3a**)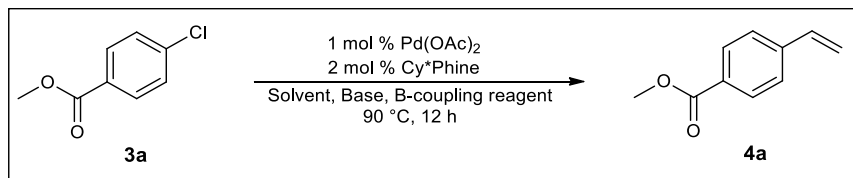

| Entry | Reaction Vials | Solvent                  | Coupling reagent                        | Base                            | Yield 4a (%)             | Starting Material 3a (%) |
|-------|----------------|--------------------------|-----------------------------------------|---------------------------------|--------------------------|--------------------------|
| 1     | E1             | Dioxane:H <sub>2</sub> O | Vinylboronic acid pinacol ester         | K <sub>2</sub> CO <sub>3</sub>  | 95.7                     |                          |
| 2     | E2             |                          |                                         | Cs <sub>2</sub> CO <sub>3</sub> | 97.1                     |                          |
| 3     | E3             |                          |                                         | NaHCO <sub>3</sub>              | 77.9                     | 14.2                     |
| 4     | E4             |                          |                                         | Cy <sub>2</sub> NMe             | 56.8                     | 29.7                     |
| 5     | F1             |                          | Potassium vinyltrifluoroborate          | K <sub>2</sub> CO <sub>3</sub>  | 95.4                     |                          |
| 6     | F2             |                          |                                         | Cs <sub>2</sub> CO <sub>3</sub> | 96.4                     |                          |
| 7     | F3             |                          |                                         | NaHCO <sub>3</sub>              | 54.5                     | 36.5                     |
| 8     | F4             |                          |                                         | Cy <sub>2</sub> NMe             | 67.7                     | 29.2                     |
| 9     | G1             |                          | Vinylboronic acid dibutyl ester         | K <sub>2</sub> CO <sub>3</sub>  | 97.9                     |                          |
| 10    | G2             |                          |                                         | Cs <sub>2</sub> CO <sub>3</sub> | 92.4                     |                          |
| 11    | G3             |                          |                                         | NaHCO <sub>3</sub>              | 90.5                     |                          |
| 12    | G4             |                          |                                         | Cy <sub>2</sub> NMe             | 77.6                     |                          |
| 13    | H1             |                          | Vinylboronic anhydride pyridine complex | K <sub>2</sub> CO <sub>3</sub>  | 98.6                     |                          |
| 14    | H2             |                          |                                         | Cs <sub>2</sub> CO <sub>3</sub> | 98.7                     |                          |
| 15    | H3             |                          |                                         | NaHCO <sub>3</sub>              | 86.9                     | 6.1                      |
| 16    | H4             |                          |                                         | Cy <sub>2</sub> NMe             | 59.9                     | 30.7                     |
| 17    | E5             | DMF                      | Vinylboronic acid pinacol ester         | K <sub>2</sub> CO <sub>3</sub>  | 98.7                     |                          |
| 18    | E6             |                          |                                         | Cs <sub>2</sub> CO <sub>3</sub> | 83.6                     |                          |
| 19    | E7             |                          |                                         | NaHCO <sub>3</sub>              | 29.4                     | 54.3                     |
| 20    | E8             |                          |                                         | Cy <sub>2</sub> NMe             | 3.6                      | 86.7                     |
| 21    | F5             |                          | Potassium vinyltrifluoroborate          | K <sub>2</sub> CO <sub>3</sub>  | 55.0                     | 29.2                     |
| 22    | F6             |                          |                                         | Cs <sub>2</sub> CO <sub>3</sub> | 8.0                      | 55.2                     |
| 23    | F7             |                          |                                         | NaHCO <sub>3</sub>              | 66.9                     | 26.4                     |
| 24    | F8             |                          |                                         | Cy <sub>2</sub> NMe             | 21.7                     | 59.9                     |
| 25    | G5             |                          | Vinylboronic acid dibutyl ester         | K <sub>2</sub> CO <sub>3</sub>  | 82.8                     |                          |
| 26    | G6             |                          |                                         | Cs <sub>2</sub> CO <sub>3</sub> | 19.6 (55.0) <sup>1</sup> |                          |
| 27    | G7             |                          |                                         | NaHCO <sub>3</sub>              | 73.3                     |                          |
| 28    | G8             |                          |                                         | Cy <sub>2</sub> NMe             | 7.2                      | 76.9                     |
| 29    | H5             |                          | Vinylboronic anhydride pyridine complex | K <sub>2</sub> CO <sub>3</sub>  | 94.6                     |                          |
| 30    | H6             |                          |                                         | Cs <sub>2</sub> CO <sub>3</sub> | 50.2                     | 13.8                     |
| 31    | H7             |                          |                                         | NaHCO <sub>3</sub>              | 52.6                     | 36.3                     |
| 32    | H8             |                          |                                         | Cy <sub>2</sub> NMe             | 5.8                      | 88.1                     |
| 33    | E9             | MeCN                     | Vinylboronic acid pinacol ester         | K <sub>2</sub> CO <sub>3</sub>  | 97.6                     |                          |
| 34    | E10            |                          |                                         | Cs <sub>2</sub> CO <sub>3</sub> | 70.4                     |                          |
| 35    | E11            |                          |                                         | NaHCO <sub>3</sub>              | 4.5                      | 97.5                     |
| 36    | E12            |                          |                                         | Cy <sub>2</sub> NMe             | 3.6                      | 90.4                     |
| 37    | F9             |                          | Potassium vinyltrifluoroborate          | K <sub>2</sub> CO <sub>3</sub>  | 100.4                    |                          |
| 38    | F10            |                          |                                         | Cs <sub>2</sub> CO <sub>3</sub> | 7.3                      | 35.0                     |
| 39    | F11            |                          |                                         | NaHCO <sub>3</sub>              | 33.9                     | 34.0                     |
| 40    | F12            |                          |                                         | Cy <sub>2</sub> NMe             | 24.9                     | 74.9                     |
| 41    | G9             |                          | Vinylboronic acid dibutyl ester         | K <sub>2</sub> CO <sub>3</sub>  | 87.1                     |                          |
| 42    | G10            |                          |                                         | Cs <sub>2</sub> CO <sub>3</sub> | 48.0 (30.4) <sup>2</sup> |                          |
| 43    | G11            |                          |                                         | NaHCO <sub>3</sub>              | 41.1                     | 40.5                     |

|    |     |                                         |                                 |      |      |
|----|-----|-----------------------------------------|---------------------------------|------|------|
| 44 | G12 | Vinylboronic anhydride pyridine complex | Cy <sub>2</sub> NMe             | 5.4  | 83.6 |
| 45 | H9  |                                         | K <sub>2</sub> CO <sub>3</sub>  | 92.4 |      |
| 46 | H10 |                                         | Cs <sub>2</sub> CO <sub>3</sub> | 40.9 |      |
| 47 | H11 |                                         | NaHCO <sub>3</sub>              | 21.3 | 70.6 |
| 48 | H12 |                                         | Cy <sub>2</sub> NMe             | 5.4  | 88.6 |

<sup>1</sup> Estimated yield for 4-vinyl-benzoic acid butyl ester

4-vinyl benzoic acid butyl ester was observed in two of the reactions (Table S1, entries 26 and 42), both involving the vinylboronic acid dibutyl ester and Cs<sub>2</sub>CO<sub>3</sub> in MeCN and DMF – identification established by GC/MS analysis.

### HTS 1

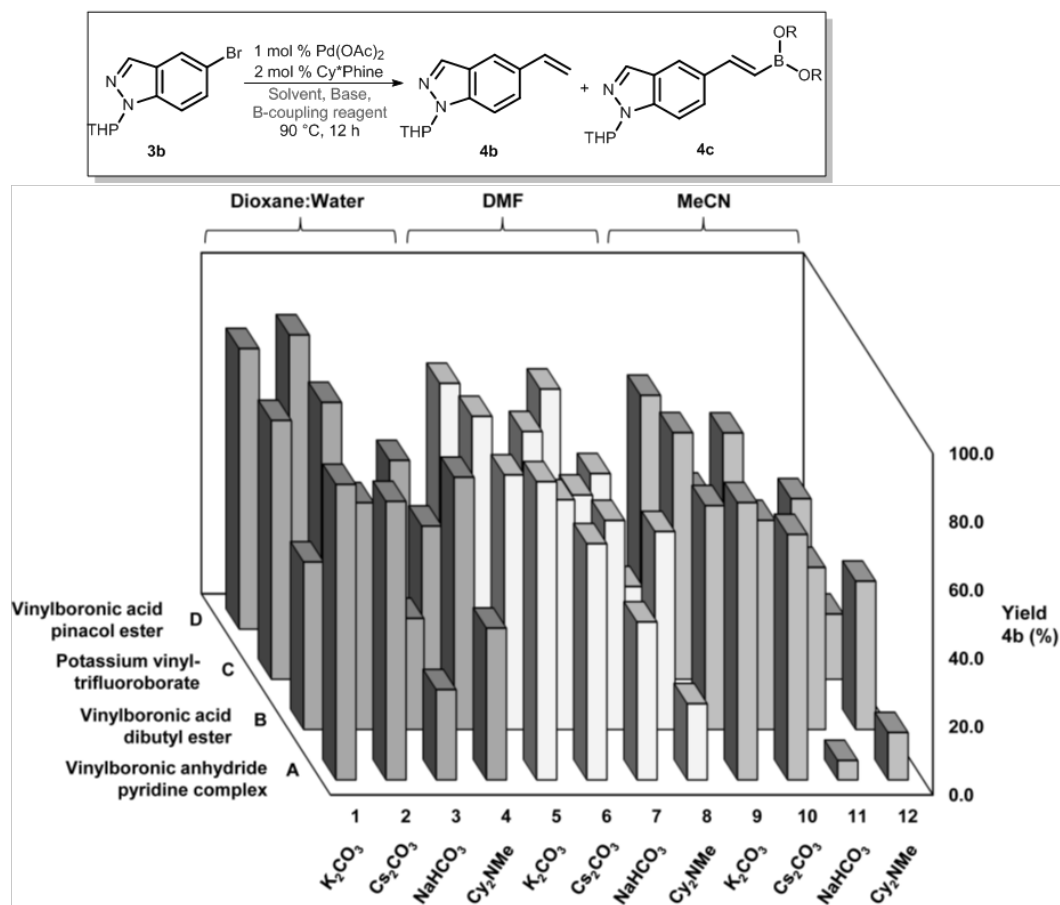

**Figure S2.** Solvent, base and vinylic boron reagent optimization for **HTS 1**. Reaction conditions: **3b** (0.125 mmol), boron reagent (0.150 mmol), base (0.250 mmol), solvent (475  $\mu$ L). Pd-Cy\*Phine catalyst (25  $\mu$ L). Yields were calculated by HPLC using phenanthrene as the internal standard and quantified through the calibration curves.

**Table S2:** Product yields for Suzuki coupling of 5-bromo-1-(tetrahydro-pyran-2-yl)-1H-indazole (3b)

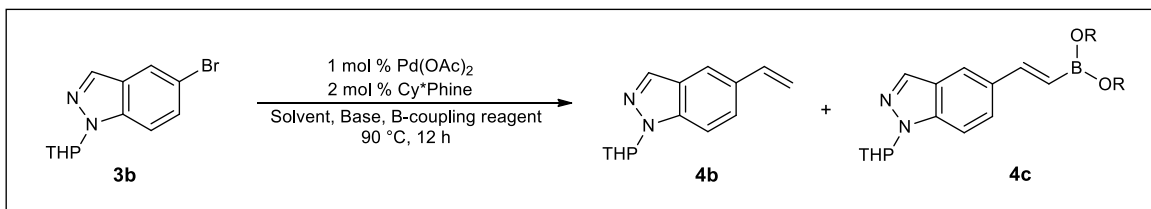

| Entry | Reaction Vials | Solvent                  | Coupling reagent                        | Base                            | Yield 4b (%) <sup>1</sup> | Starting material 3b (%) |
|-------|----------------|--------------------------|-----------------------------------------|---------------------------------|---------------------------|--------------------------|
| 1     | A1             | Dioxane:H <sub>2</sub> O | Vinylboronic acid pinacol ester         | K <sub>2</sub> CO <sub>3</sub>  | 86.5                      | 28.1                     |
| 2     | A2             |                          |                                         | Cs <sub>2</sub> CO <sub>3</sub> | 81.5                      |                          |
| 3     | A3             |                          |                                         | NaHCO <sub>3</sub>              | 26.4                      |                          |
| 4     | A4             |                          |                                         | Cy <sub>2</sub> NMe             | 44.4                      |                          |
| 5     | B1             |                          | Potassium vinyltrifluoroborate          | K <sub>2</sub> CO <sub>3</sub>  | 49.1                      | 31.6                     |
| 6     | B2             |                          |                                         | Cs <sub>2</sub> CO <sub>3</sub> | 66.4                      |                          |
| 7     | B3             |                          |                                         | NaHCO <sub>3</sub>              | 32.5                      |                          |
| 8     | B4             |                          |                                         | Cy <sub>2</sub> NMe             | 73.9                      |                          |
| 9     | C1             |                          | Vinylboronic acid dibutyl ester         | K <sub>2</sub> CO <sub>3</sub>  | 75.9                      | 16.1                     |
| 10    | C2             |                          |                                         | Cs <sub>2</sub> CO <sub>3</sub> | 81.2                      |                          |
| 11    | C3             |                          |                                         | NaHCO <sub>3</sub>              | 34.3                      |                          |
| 12    | C4             |                          |                                         | Cy <sub>2</sub> NMe             | 44.9                      |                          |
| 13    | D1             |                          | Vinylboronic anhydride pyridine complex | K <sub>2</sub> CO <sub>3</sub>  | 82.2                      |                          |
| 14    | D2             |                          |                                         | Cs <sub>2</sub> CO <sub>3</sub> | 86.2                      |                          |
| 15    | D3             |                          |                                         | NaHCO <sub>3</sub>              | 33.6                      |                          |
| 16    | D4             |                          |                                         | Cy <sub>2</sub> NMe             | 49.4                      |                          |
| 17    | A5             | DMF                      | Vinylboronic acid pinacol ester         | K <sub>2</sub> CO <sub>3</sub>  | 87.3                      |                          |
| 18    | A6             |                          |                                         | Cs <sub>2</sub> CO <sub>3</sub> | 69.1                      |                          |
| 19    | A7             |                          |                                         | NaHCO <sub>3</sub>              | 46.2                      |                          |
| 20    | A8             |                          |                                         | Cy <sub>2</sub> NMe             | 22.2                      |                          |
| 21    | B5             |                          | Potassium vinyltrifluoroborate          | K <sub>2</sub> CO <sub>3</sub>  | 74.6                      |                          |
| 22    | B6             |                          |                                         | Cs <sub>2</sub> CO <sub>3</sub> | 67.3                      |                          |
| 23    | B7             |                          |                                         | NaHCO <sub>3</sub>              | 61.3                      |                          |
| 24    | B8             |                          |                                         | Cy <sub>2</sub> NMe             | 58.0                      |                          |
| 25    | C5             |                          | Vinylboronic acid dibutyl ester         | K <sub>2</sub> CO <sub>3</sub>  | 77.1                      |                          |
| 26    | C6             |                          |                                         | Cs <sub>2</sub> CO <sub>3</sub> | 72.6                      |                          |
| 27    | C7             |                          |                                         | NaHCO <sub>3</sub>              | 54.0                      |                          |
| 28    | C8             |                          |                                         | Cy <sub>2</sub> NMe             | 27.2                      |                          |
| 29    | D5             |                          | Vinylboronic anhydride pyridine complex | K <sub>2</sub> CO <sub>3</sub>  | 72.0                      |                          |
| 30    | D6             |                          |                                         | Cs <sub>2</sub> CO <sub>3</sub> | 31.1                      |                          |
| 31    | D7             |                          |                                         | NaHCO <sub>3</sub>              | 70.4                      |                          |
| 32    | D8             |                          |                                         | Cy <sub>2</sub> NMe             | 45.6                      |                          |
| 33    | A9             | MeCN                     | Vinylboronic acid pinacol ester         | K <sub>2</sub> CO <sub>3</sub>  | 81.2                      | 61.3                     |
| 34    | A10            |                          |                                         | Cs <sub>2</sub> CO <sub>3</sub> | 71.8                      |                          |
| 35    | A11            |                          |                                         | NaHCO <sub>3</sub>              | 5.6                       |                          |
| 36    | A12            |                          |                                         | Cy <sub>2</sub> NMe             | 13.8                      |                          |
| 37    | B9             |                          | Potassium vinyltrifluoroborate          | K <sub>2</sub> CO <sub>3</sub>  | 65.6                      | 20.0                     |
| 38    | B10            |                          |                                         | Cs <sub>2</sub> CO <sub>3</sub> | 61.3                      |                          |
| 39    | B11            |                          |                                         | NaHCO <sub>3</sub>              | 47.5                      |                          |
| 40    | B12            |                          |                                         | Cy <sub>2</sub> NMe             | 43.5                      |                          |
| 41    | C9             |                          | Vinylboronic acid                       | K <sub>2</sub> CO <sub>3</sub>  | 72.3                      |                          |



|    |     |  |                                         |                                 |      |      |
|----|-----|--|-----------------------------------------|---------------------------------|------|------|
| 42 | C10 |  | dibutyl ester                           | Cs <sub>2</sub> CO <sub>3</sub> | 72.2 |      |
| 43 | C11 |  |                                         | NaHCO <sub>3</sub>              | 17.2 | 31.7 |
| 44 | C12 |  |                                         | Cy <sub>2</sub> NMe             | 19.1 |      |
| 45 | D9  |  | Vinylboronic anhydride pyridine complex | K <sub>2</sub> CO <sub>3</sub>  | 68.5 |      |
| 46 | D10 |  |                                         | Cs <sub>2</sub> CO <sub>3</sub> | 39.9 |      |
| 47 | D11 |  |                                         | NaHCO <sub>3</sub>              | 19.1 | 64.9 |
| 48 | D12 |  |                                         | Cy <sub>2</sub> NMe             | 38.2 |      |

<sup>1</sup>Does not include values for **4c** for entries 1-4, 17-18, 33-36

**General procedure for Suzuki-Heck Relay (SHR) reaction:** Substrate concentration was 0.25 M, with 1.01 equivalent of boron coupling reagent (0.33 equivalents for the vinylboronic anhydride complex). For combinations involving a single base, 5.0 equivalents were added at the beginning; for dual base combinations, 2.0 equivalents of each base were added at each step. Phenanthrene was used as internal standard, and the catalyst solution was prepared in toluene at room temperature. The plate was sealed and heated/stirred at 90 °C overnight. 1.1 equivalent of 3-chloropyridine and Cy<sub>2</sub>NMe were added as required. The plate was re-sealed and heated/stirred at 120 °C overnight. After cool-down, aliquots of 10 uL were flushed through silica on a multi-well filtration plate with a 50:50 MeCN:MeOH solution to a total volume of about 500 uL. An additional equivalent of the catalyst solution was added to the reactions and the plate was run once again overnight at 120 °C, after which a second set of aliquots was filtered/diluted. Reactions were analysed by GC-FID [inlet = 250 °C; split ratio = 50:1; inlet pressure = 13.0 psi; oven initial temperature = 65 °C, program holds initial temperature for 0.5 minute, then ramp (40 °C/min) to 150 °C, held for 0.5 minute, ramp (45 °C/min) to 250 °C, held for 2.5 minutes, ramp (45 °C/min) to 275 °C, held for 1.5 minutes (total runtime of 9.91 minutes); detector temperature = 275 °C];

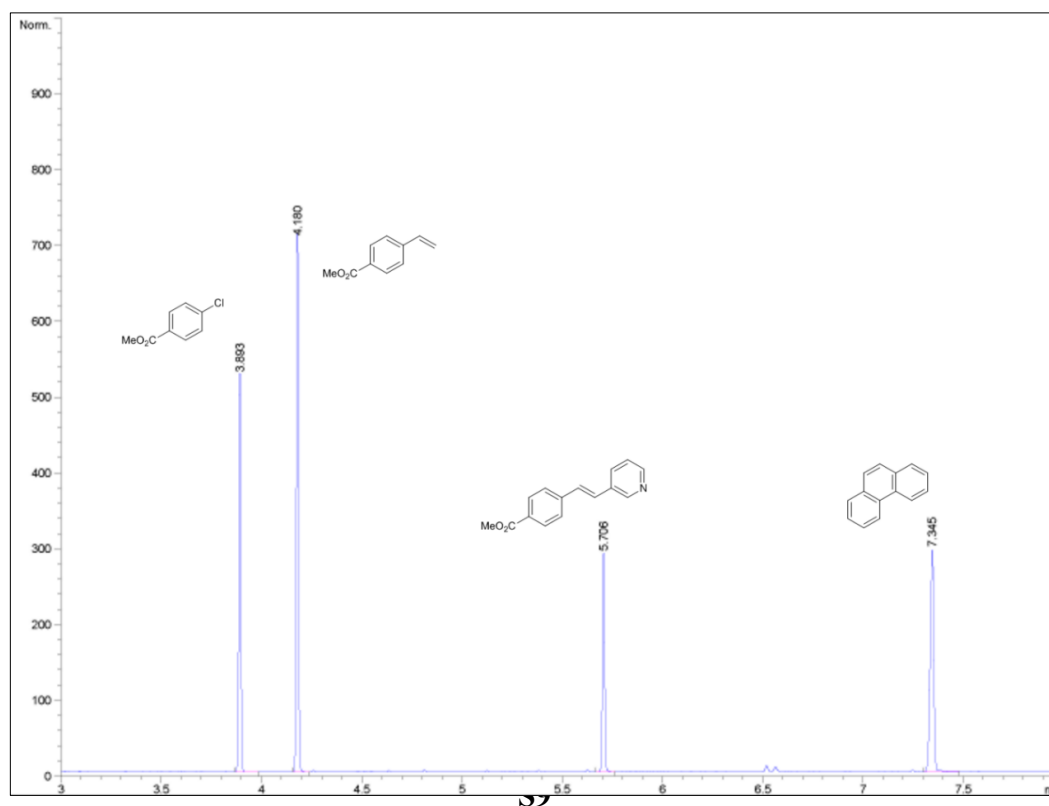

**Table S3:** Product yields for the Suzuki-Heck relay reaction of methyl-4-chlorobenzoate with 3-chloropyridine

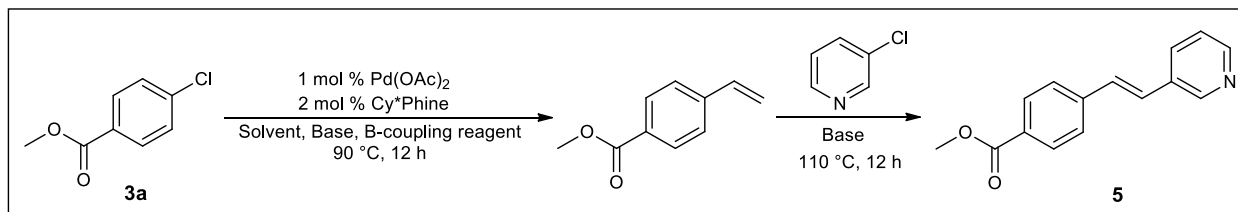

| Entry | Reaction vial | Solvent | Coupling reagent                        | Base                                                  | Yield <b>5</b> (%) | Yield <b>5'</b> (%) |
|-------|---------------|---------|-----------------------------------------|-------------------------------------------------------|--------------------|---------------------|
| 1     | A1            | Dioxane | Vinylboronic acid pinacol ester         | K <sub>2</sub> CO <sub>3</sub>                        | -                  | 11.0                |
| 2     | B1            |         |                                         | K <sub>2</sub> CO <sub>3</sub> , Cy <sub>2</sub> NMe  | 10.8               | 25.3                |
| 3     | C1            |         |                                         | NaHCO <sub>3</sub>                                    | 16.4               | 26.7                |
| 4     | D1            |         |                                         | NaHCO <sub>3</sub> , Cy <sub>2</sub> NMe              | 11.9               | 62.8                |
| 5     | E1            |         |                                         | Cs <sub>2</sub> CO <sub>3</sub> , Cy <sub>2</sub> NMe | 20.7               | 29.9                |
| 6     | F1            |         |                                         | Cy <sub>2</sub> NMe                                   | 3.0                | -                   |
| 7     | A2            |         | Potassium vinyltrifluoroborate          | K <sub>2</sub> CO <sub>3</sub>                        | -                  | 18.2                |
| 8     | B2            |         |                                         | K <sub>2</sub> CO <sub>3</sub> , Cy <sub>2</sub> NMe  | 8.2                | -                   |
| 9     | C2            |         |                                         | NaHCO <sub>3</sub>                                    | 17.5               | 13.4                |
| 10    | D2            |         |                                         | NaHCO <sub>3</sub> , Cy <sub>2</sub> NMe              | 9.9                | 68.1                |
| 11    | E2            |         |                                         | Cs <sub>2</sub> CO <sub>3</sub> , Cy <sub>2</sub> NMe | -                  | 24.8                |
| 12    | F2            |         |                                         | Cy <sub>2</sub> NMe                                   | 14.1               | -                   |
| 13    | A3            |         | Vinylboronic acid dibutyl ester         | K <sub>2</sub> CO <sub>3</sub>                        | -                  | 30.0                |
| 14    | B3            |         |                                         | K <sub>2</sub> CO <sub>3</sub> , Cy <sub>2</sub> NMe  | -                  | 30.0                |
| 15    | C3            |         |                                         | NaHCO <sub>3</sub>                                    | 10.5               | 53.9                |
| 16    | D3            |         |                                         | NaHCO <sub>3</sub> , Cy <sub>2</sub> NMe              | 19.0               | 42.1                |
| 17    | F3            |         |                                         | Cy <sub>2</sub> NMe                                   | -                  | 15.1                |
| 18    | A4            |         | Vinylboronic anhydride pyridine complex | K <sub>2</sub> CO <sub>3</sub>                        | 10.9               | 43.8                |
| 19    | B4            |         |                                         | K <sub>2</sub> CO <sub>3</sub> , Cy <sub>2</sub> NMe  | 71.7               | 92.5                |
| 20    | C4            |         |                                         | NaHCO <sub>3</sub>                                    | -                  | 22.5                |
| 21    | D4            |         |                                         | NaHCO <sub>3</sub> , Cy <sub>2</sub> NMe              | 9.5                | 34.4                |
| 22    | E4            |         |                                         | Cs <sub>2</sub> CO <sub>3</sub> , Cy <sub>2</sub> NMe | -                  | 12.9                |
| 23    | F4            |         |                                         | Cy <sub>2</sub> NMe                                   | 7.8                | 19.6                |
| 24    | A5            | DMF     | Vinylboronic acid pinacol ester         | K <sub>2</sub> CO <sub>3</sub>                        | 5.2                | 8.4                 |
| 25    | B5            |         |                                         | K <sub>2</sub> CO <sub>3</sub> , Cy <sub>2</sub> NMe  | 25.9               | 70.3                |
| 26    | C5            |         |                                         | NaHCO <sub>3</sub>                                    | 64.4               | 70.4                |
| 27    | D5            |         |                                         | NaHCO <sub>3</sub> , Cy <sub>2</sub> NMe              | 69.5               | 75.8                |
| 28    | E5            |         |                                         | Cs <sub>2</sub> CO <sub>3</sub> , Cy <sub>2</sub> NMe | 14.8               | 25.1                |
| 29    | A6            |         | Potassium vinyltrifluoroborate          | K <sub>2</sub> CO <sub>3</sub>                        | 11.8               | 20.2                |
| 30    | B6            |         |                                         | K <sub>2</sub> CO <sub>3</sub> , Cy <sub>2</sub> NMe  | 16.3               | 40.5                |
| 31    | C6            |         |                                         | NaHCO <sub>3</sub>                                    | 11.8               | 32.7                |
| 32    | D6            |         |                                         | NaHCO <sub>3</sub> , Cy <sub>2</sub> NMe              | 19.0               | 36.5                |
| 33    | F6            |         |                                         | Cy <sub>2</sub> NMe                                   | 5.9                | 12.1                |
| 34    | A7            |         | Vinylboronic acid dibutyl ester         | K <sub>2</sub> CO <sub>3</sub>                        | -                  | -                   |
| 35    | B7            |         |                                         | K <sub>2</sub> CO <sub>3</sub> , Cy <sub>2</sub> NMe  | 6.8                | 27.6                |
| 36    | C7            |         |                                         | NaHCO <sub>3</sub>                                    | 50.8               | 79.5                |
| 37    | D7            |         |                                         | NaHCO <sub>3</sub> , Cy <sub>2</sub> NMe              | 38.0               | 72.0                |
| 38    | A8            |         | Vinylboronic anhydride pyridine complex | K <sub>2</sub> CO <sub>3</sub>                        | 6.9                | 43.4                |
| 39    | B8            |         |                                         | K <sub>2</sub> CO <sub>3</sub> , Cy <sub>2</sub> NMe  | 61.1               | 87.5                |
| 40    | C8            |         |                                         | NaHCO <sub>3</sub>                                    | 31.1               | 75.1                |

|    |     |              |                                         |                                                       |      |      |
|----|-----|--------------|-----------------------------------------|-------------------------------------------------------|------|------|
| 41 | D8  |              |                                         | NaHCO <sub>3</sub> , Cy <sub>2</sub> NMe              | 23.3 | 56.2 |
| 42 | E8  |              |                                         | Cs <sub>2</sub> CO <sub>3</sub> , Cy <sub>2</sub> NMe | 28.6 | 37.5 |
| 43 | A9  | Acetonitrile | Vinylboronic acid pinacol ester         | K <sub>2</sub> CO <sub>3</sub>                        | -    | -    |
| 44 | B9  |              |                                         | K <sub>2</sub> CO <sub>3</sub> , Cy <sub>2</sub> NMe  | -    | 12.2 |
| 45 | E9  |              |                                         | Cs <sub>2</sub> CO <sub>3</sub> , Cy <sub>2</sub> NMe | -    | 10.3 |
| 46 | A10 |              | Potassium vinyltrifluoroborate          | K <sub>2</sub> CO <sub>3</sub>                        | -    | 5.7  |
| 47 | B10 |              |                                         | K <sub>2</sub> CO <sub>3</sub> , Cy <sub>2</sub> NMe  | 3.5  | 16.5 |
| 48 | C10 |              |                                         | NaHCO <sub>3</sub>                                    | 47.0 | 69.7 |
| 49 | D10 |              |                                         | NaHCO <sub>3</sub> , Cy <sub>2</sub> NMe              | 18.3 | 34.4 |
| 50 | F10 |              |                                         | Cy <sub>2</sub> NMe                                   | -    | 11.3 |
| 51 | A11 |              | Vinylboronic acid dibutyl ester         | K <sub>2</sub> CO <sub>3</sub>                        | -    | -    |
| 52 | B11 |              |                                         | K <sub>2</sub> CO <sub>3</sub> , Cy <sub>2</sub> NMe  | -    | 13.2 |
| 53 | C11 |              |                                         | NaHCO <sub>3</sub>                                    | 61.1 | 70.3 |
| 54 | D11 |              | Vinylboronic anhydride pyridine complex | NaHCO <sub>3</sub> , Cy <sub>2</sub> NMe              | 44.1 | 55.6 |
| 55 | A12 |              |                                         | K <sub>2</sub> CO <sub>3</sub>                        | -    | 4.8  |
| 56 | B12 |              |                                         | K <sub>2</sub> CO <sub>3</sub> , Cy <sub>2</sub> NMe  | 33.4 | 62.0 |
| 57 | C12 |              |                                         | NaHCO <sub>3</sub>                                    | 35.6 | 57.9 |
| 58 | D12 |              |                                         | NaHCO <sub>3</sub> , Cy <sub>2</sub> NMe              | 22.7 | 42.7 |
| 59 | E12 |              |                                         | Cs <sub>2</sub> CO <sub>3</sub> , Cy <sub>2</sub> NMe | 4.5  | 9.6  |

4-vinyl benzoic acid butyl ester was observed in three of the reactions (*Table S3*, entries 3, 7, and 11); the corresponding Suzuki-Heck product was only observed in the case of entry 3 (confirmed by GC/MS). Yield 5' (%) = increased yield (%) of compound 5 after addition of more catalyst.

**Table S4:** Conversion values for the Suzuki-Heck relay reaction of 5-bromo-1-(tetrahydropyran-2-yl)-1H-indazole with 3-chloropyridine

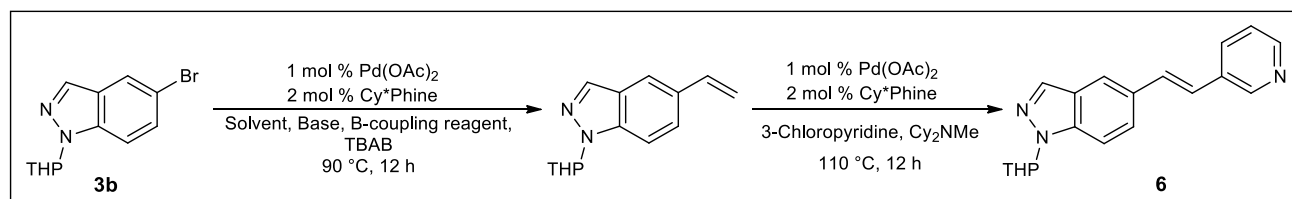

| Entry | Bases                                               | Solvent | Coupling reagent                        | GC/MS conversion (%) |
|-------|-----------------------------------------------------|---------|-----------------------------------------|----------------------|
| 1     | K <sub>2</sub> CO <sub>3</sub> /Cy <sub>2</sub> NMe | DMF     | Vinylboronic anhydride pyridine complex | 91                   |
| 2     |                                                     | Dioxane | Vinylboronic anhydride pyridine complex | 89                   |
| 3     |                                                     | DMF     | Vinylboronic acid pinacol ester         | 92                   |

**Representative procedure for scale-up Suzuki-Heck Relay (SHR) reaction:** An 8 ml vial fitted with a Teflon-lined septum and a magnetic stir bar was charged with aryl halide (0.5 mmol, 1 equiv.), vinylboronic anhydride pyridine complex (0.165 mmol, 0.33 equiv.),  $K_2CO_3$  (1 mmol, 2 equiv.), TBAB (0.1 mmol, 0.2 equiv.), DMF (1.9 mL), Pd-Cy\*Phine catalyst (100  $\mu$ L, 1 mol%  $Pd(OAc)_2$  + 2 mol% Cy\*Phine) [the catalyst solution was prepared *in situ* by dissolving  $Pd(OAc)_2$  (12 mg, 0.05 mmol) and Cy\*Phine (52 mg, 0.1 mmol) in toluene (1000  $\mu$ L)]. The vial was sealed and then heated at 90 °C for 12 h. An aliquot of the reaction mixture was sampled for GC-MS analysis to determine the Suzuki completion. To the same vial, aryl halide (0.55 mmol, 1.1 equiv.) and  $Cy_2NMe$  (1 mmol, 2 equiv.) and Pd-Cy\*Phine catalyst (100  $\mu$ L) were added. The vial was sealed and allowed to heat at 110 °C for another 12 h. The completion of the Heck reaction was confirmed by GC/MS analysis. The reaction mixture was diluted with  $CH_2Cl_2$  (15 mL) and the solution was transferred to a separatory funnel (150 mL). The dilute solution was then washed with water (3  $\times$  15 mL) and dried over anhydrous  $MgSO_4$ .  $CH_2Cl_2$  was removed *in vacuo* to afford the crude mixture which was finally purified by flash chromatography to obtain the desired product.

**(E)-Methyl 4-(2-(pyridin-3-yl)vinyl)benzoate (5):** off-white solid, yield (78%). The spectroscopic data ( $^1H$  and  $^{13}C$  NMR) of **5** are identical to those reported in literature.<sup>2</sup> HRMS (EI) calcd for  $C_{15}H_{13}NO_2^+$   $[M]^+$ : 239.0946, found: 239.0939.

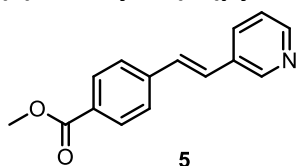

**(E)-1-(tetrahydropyran-2-yl)-(2-(pyridine-3-yl)vinyl)-1H-indazole (6):** brown solid, yield (40%).  $^1H$  NMR (400 MHz,  $CDCl_3$ )  $\delta$  8.72 (s, 1H), 8.46 (d,  $J$  = 4.5 Hz, 1H), 8.02 (s, 1H), 7.81 (dt,  $J$  = 8.0 Hz, 1H), 7.78 (s, 1H), 7.63 (d,  $J$  = 8.5 Hz, 1H), 7.58 (d,  $J$  = 8.5 Hz, 1H), 7.27 (d,  $J$  = 12.8 Hz, 1H), 7.24 (d,  $J$  = 16.5 Hz, 1H), 7.03 (d,  $J$  = 16.5 Hz, 1H), 5.71 (dd,  $J$  = 9.5, 2.7 Hz, 1H), 4.05–4.01 (m, 1H), 3.78–3.71 (m, 1H), 2.61–2.51 (m, 1H), 2.18–2.03 (m, 2H), 1.82–1.61 (m, 3H).  $^{13}C$  NMR (100 MHz,  $CDCl_3$ )  $\delta$  148.41, 148.31, 139.39, 134.30, 133.20, 132.46, 131.02, 130.35, 125.21, 124.94, 123.63, 123.55, 119.87, 110.61, 85.47, 77.29, 67.49, 29.44, 25.12, 22.56. HRMS (EI) calcd for  $C_{19}H_{19}N_3O^+$   $[M]^+$ : 305.1528, found: 305.1498.

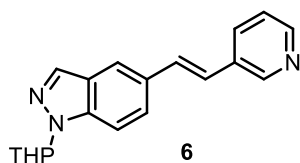

**(E)-2-amino-(2-(1-tetrahydropyran-2-yl-1H-indazole)vinyl) pyrimidine (7):** yellow solid, yield (50%).  $^1H$  NMR (400 MHz,  $CDCl_3$ )  $\delta$  8.48 (s, 2H), 8.01 (s, 1H), 7.75 (s, 1H), 7.61–7.56 (m, 2H), 7.09 (d,  $J$  = 16.5 Hz, 1H), 6.87 (d,  $J$  = 16.5 Hz, 1H), 5.71 (dd,  $J$  = 9.4, 2.7 Hz, 1H), 5.13 (s br, 2H), 4.06–4.02 (m, 1H), 3.79–3.73 (m, 1H), 2.63–2.52 (m, 1H), 2.19–2.06 (m, 2H), 1.84–1.63 (m, 3H).  $^{13}C$  NMR (100 MHz,  $CDCl_3$ )  $\delta$  161.87, 156.01, 139.22, 134.24, 130.59, 127.87, 125.24, 124.77, 122.06, 120.75, 119.31, 110.56, 85.48, 77.22, 67.51, 29.45, 25.14, 22.58. HRMS (EI) calcd for  $C_{18}H_{19}N_5O^+$   $[M]^+$ : 321.1590, found: 321.1596.

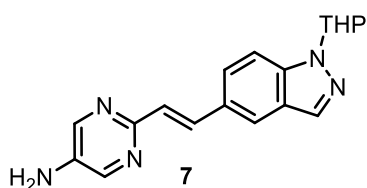

**(E)-2-(4-fluorobenzene)vinyl pyrazine (8):** white solid, yield (40%).  $^1\text{H}$  NMR (400 MHz,  $\text{CDCl}_3$ )  $\delta$  8.62 (d,  $J = 1.5$  Hz, 1H), 8.54 (dd,  $J = 2.5, 1.5$  Hz, 1H), 8.41 (d,  $J = 2.5$  Hz, 1H), 7.72 (d,  $J = 16.0$  Hz, 1H), 7.70 (s, 1H), 7.58 (d,  $J = 5.4$  Hz, 1H), 7.56 (d,  $J = 5.4$  Hz, 1H), 7.09 (t,  $J = 8.7$  Hz, 2H), 7.07 (d,  $J = 16.0$  Hz, 1H).  $^{13}\text{C}$  NMR (100 MHz,  $\text{CDCl}_3$ )  $\delta$  164.52, 162.04, 151.26, 144.50, 143.89, 142.97, 134.08, 132.44 (d,  $J_{\text{C-F}} = 3.5$  Hz), 129.13 (d,  $J_{\text{C-F}} = 8.1$  Hz), 123.91 (d,  $J_{\text{C-F}} = 2.3$  Hz), 116.06 (d,  $J_{\text{C-F}} = 21.8$  Hz), 77.36.  $^{19}\text{F}$  NMR (376 MHz,  $\text{CDCl}_3$ )  $\delta$  -111.83. HRMS (EI) calcd for  $\text{C}_{12}\text{H}_8\text{N}_2\text{F}^+$   $[\text{M-H}]^+$ : 199.0672, found: 199.0652.

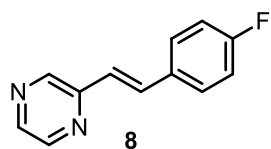

**(E)-Methyl 4-(9-phenyl carbazole)vinyl benzoate (10):** lime green solid, yield (81%).  $^1\text{H}$  NMR (400 MHz,  $\text{CDCl}_3$ )  $\delta$  8.28 (s, 1H), 8.16 (d,  $J = 7.5$  Hz, 1H), 8.02 (d,  $J = 8.0$  Hz, 2H), 7.62–7.55 (m, 7H), 7.49–7.44 (m, 2H), 7.41–7.37 (m, 3H), 7.32–7.28 (m, 1H), 7.16 (d,  $J = 16.5$  Hz, 1H), 3.91 (s, 3H).  $^{13}\text{C}$  NMR (100 MHz,  $\text{CDCl}_3$ )  $\delta$  167.16, 142.61, 141.55, 141.11, 137.60, 132.23, 130.21, 130.10, 129.71, 129.21, 129.03, 128.52, 127.81, 127.21, 126.43, 126.17, 125.43, 125.07, 123.97, 123.44, 120.53, 120.44, 119.17, 110.27, 110.18, 77.36, 52.19, 14.37. HRMS (EI) calcd for  $\text{C}_{28}\text{H}_{21}\text{NO}_2$   $[\text{M}]^+$ : 403.1572, found: 403.1546.

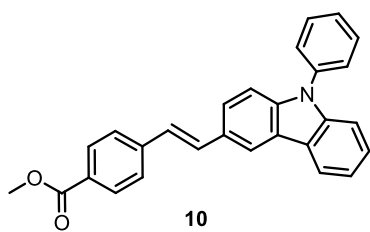

NMR spectra of one-pot Suzuki-Heck Relay products:

(*E*)-1-(tetrahydropyran-2-yl)-(2-(pyridine-3-yl)vinyl)-1H-indazole (6)

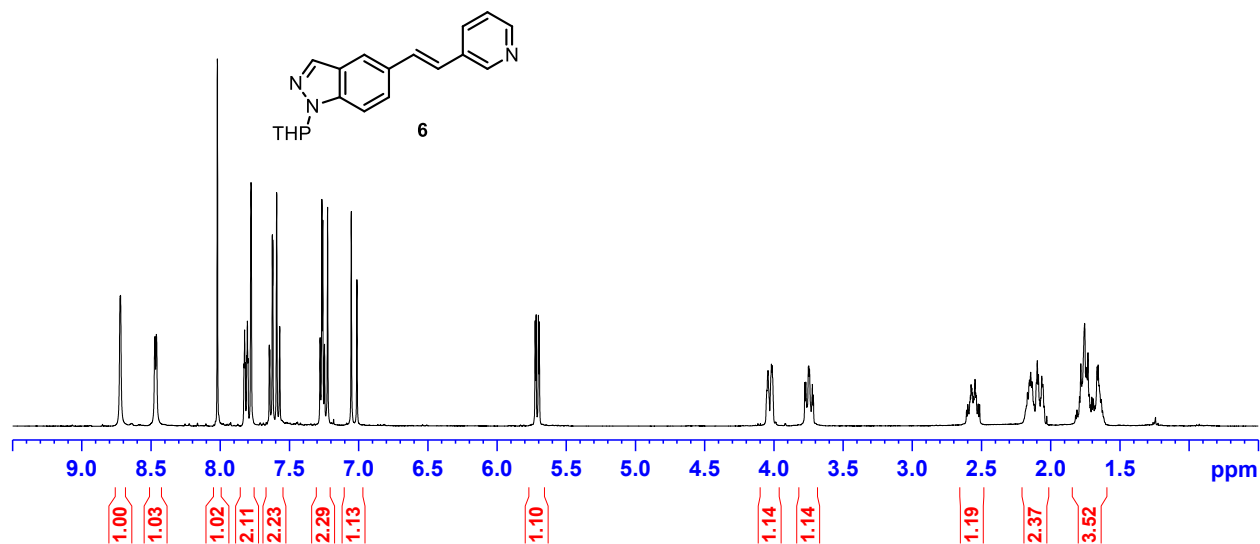

<sup>1</sup>H NMR (400 MHz, CDCl<sub>3</sub>) spectrum of 6

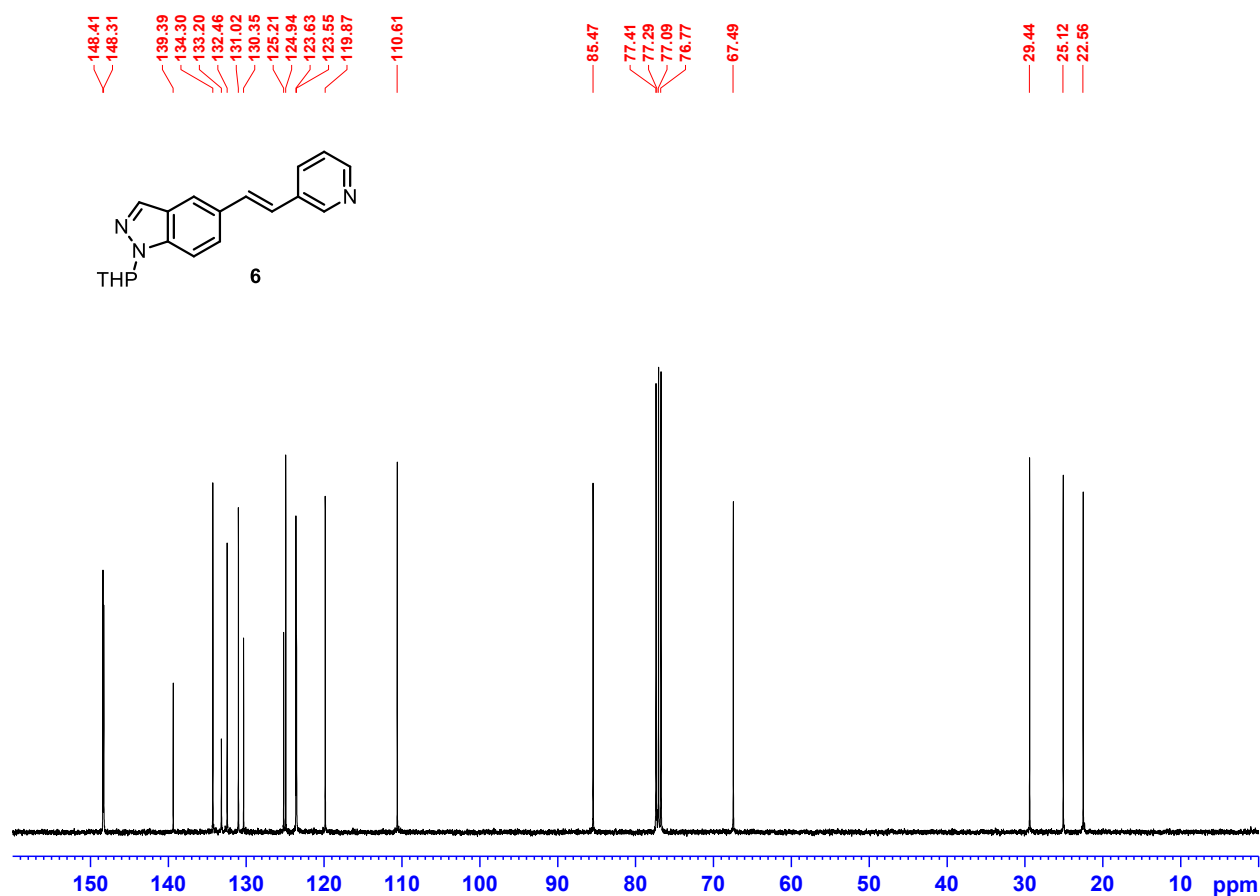

<sup>13</sup>C NMR (100 MHz, CDCl<sub>3</sub>) spectrum of **6**  
**(E)-2-amino-2-(1-(tetrahydropyran-2-yl-1H-indazole)vinyl) pyrimidine (7)**

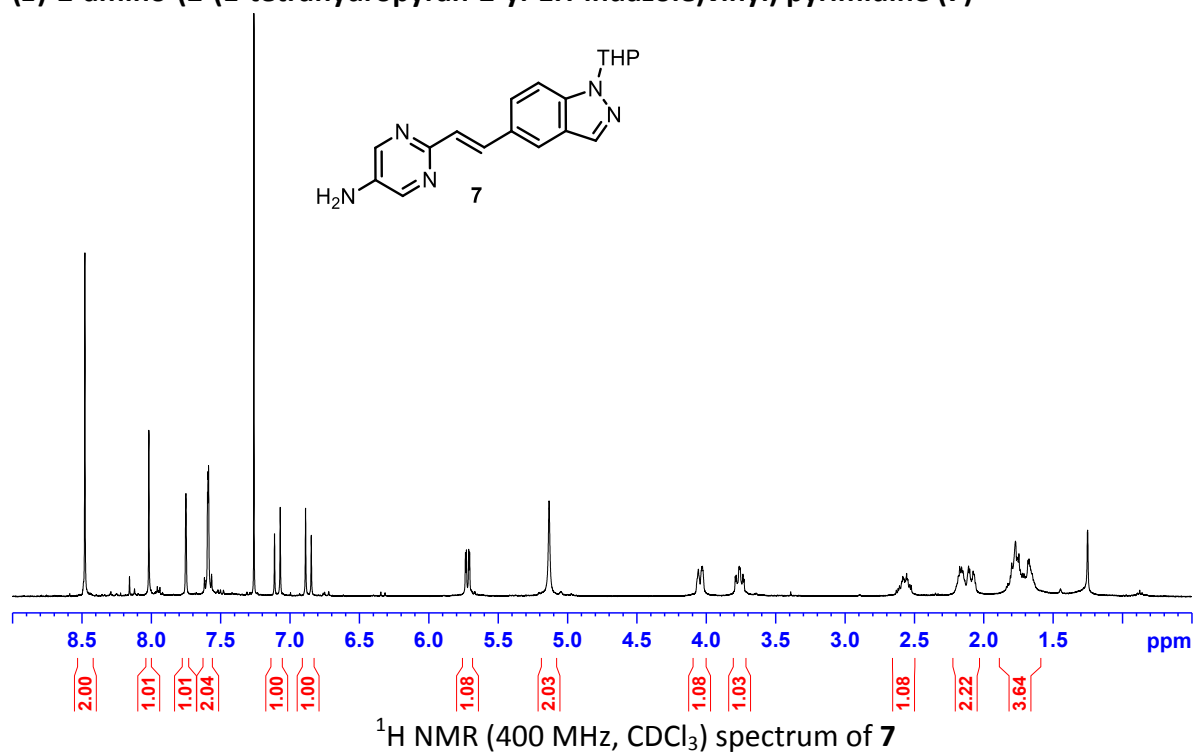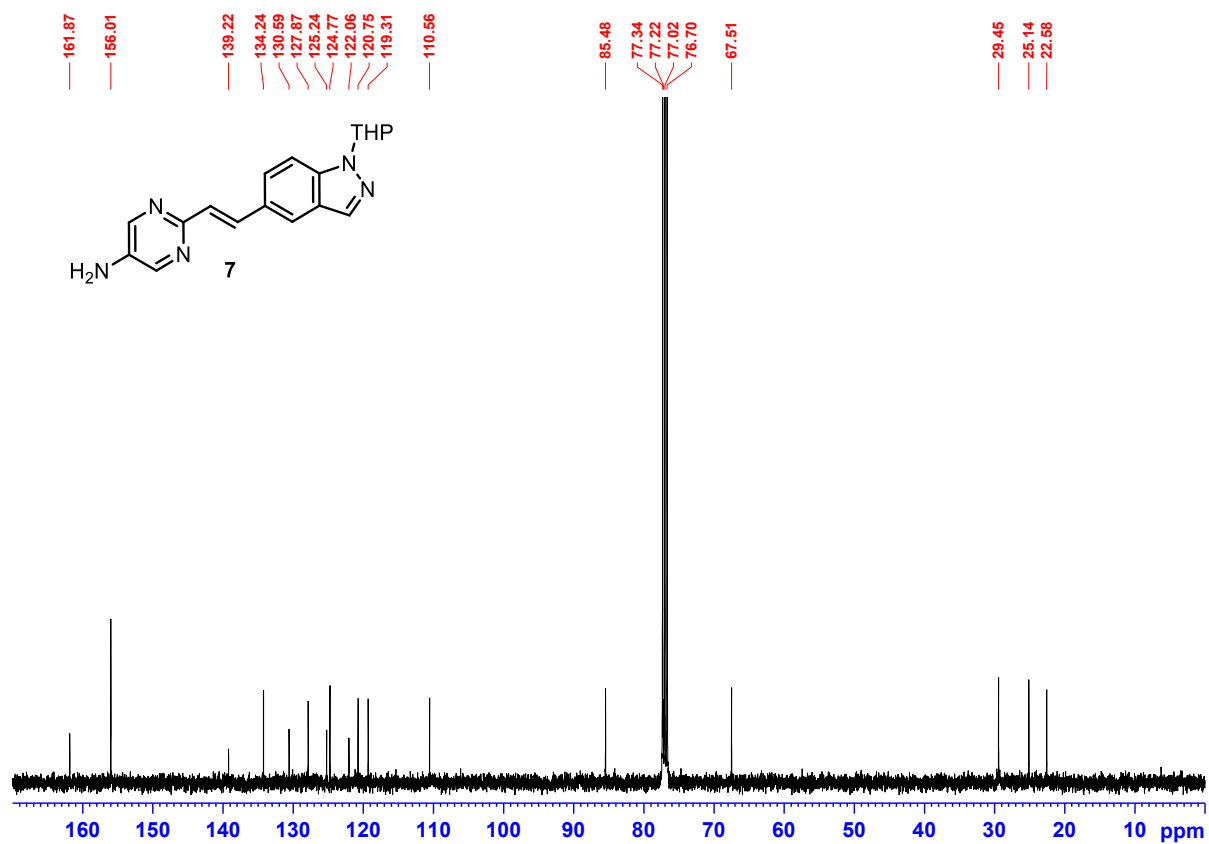

<sup>13</sup>C NMR (100 MHz, CDCl<sub>3</sub>) spectrum of **7**  
**(E)-2-(4-fluorobenzene)vinyl pyrazine (8)**

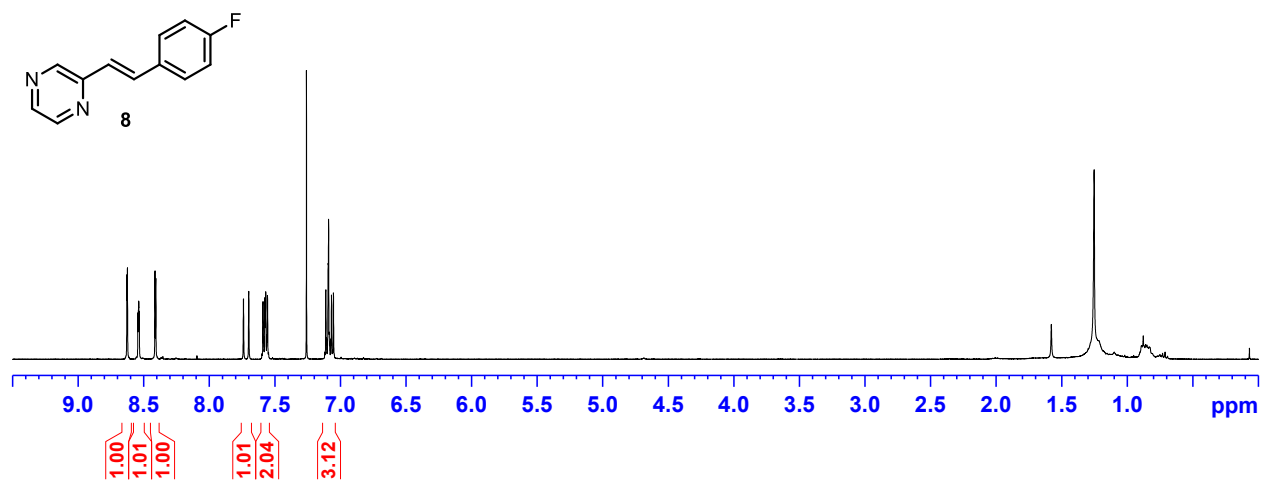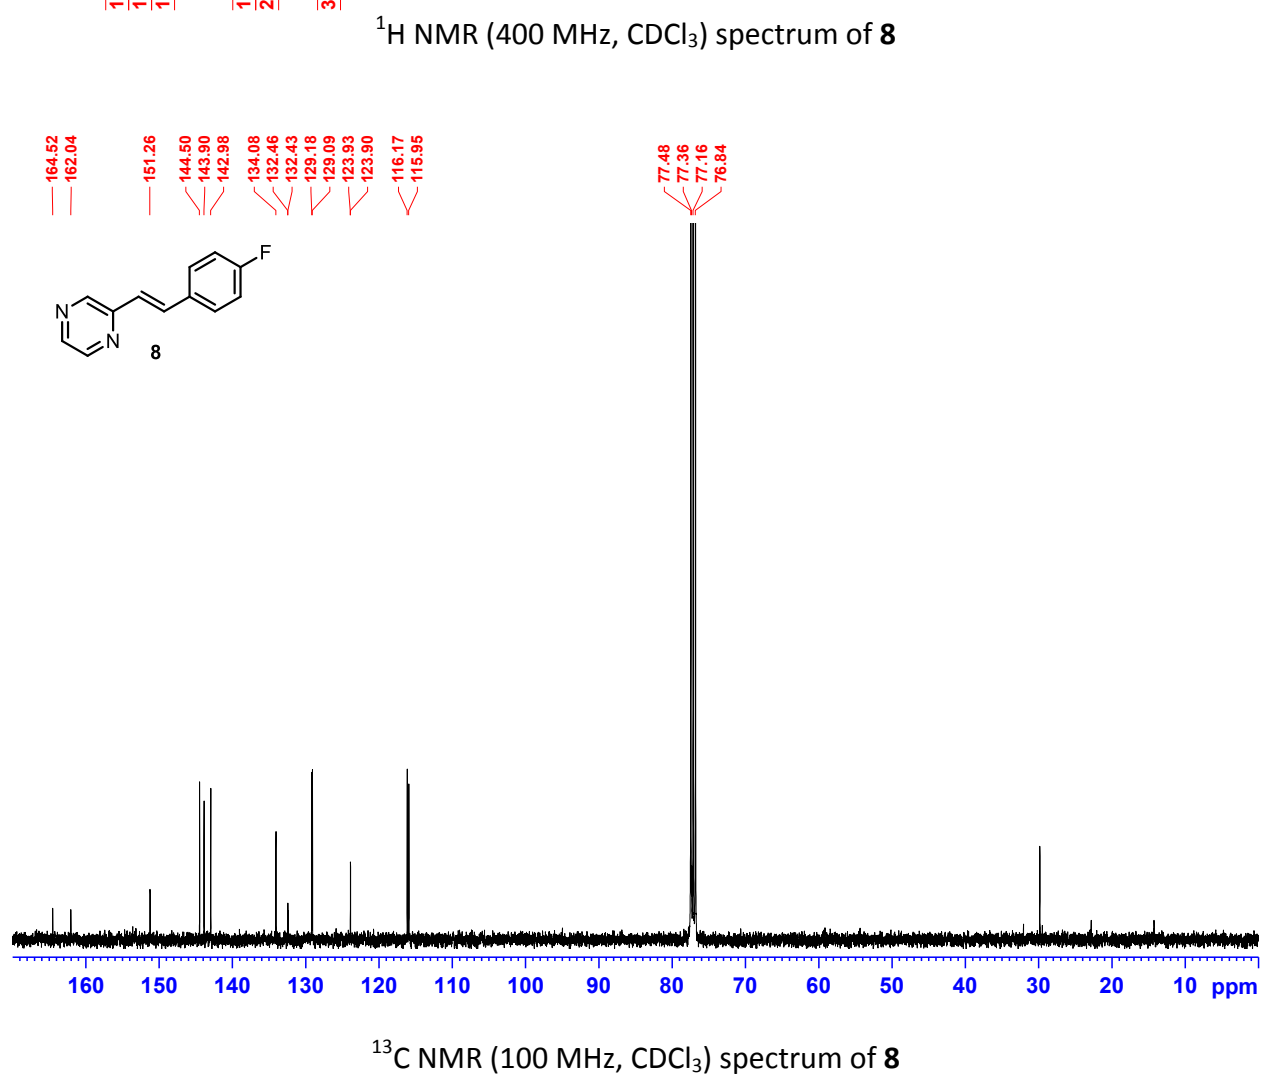



**(*E*)-2-(4-fluorobenzene)vinyl pyrazine (**8**)**

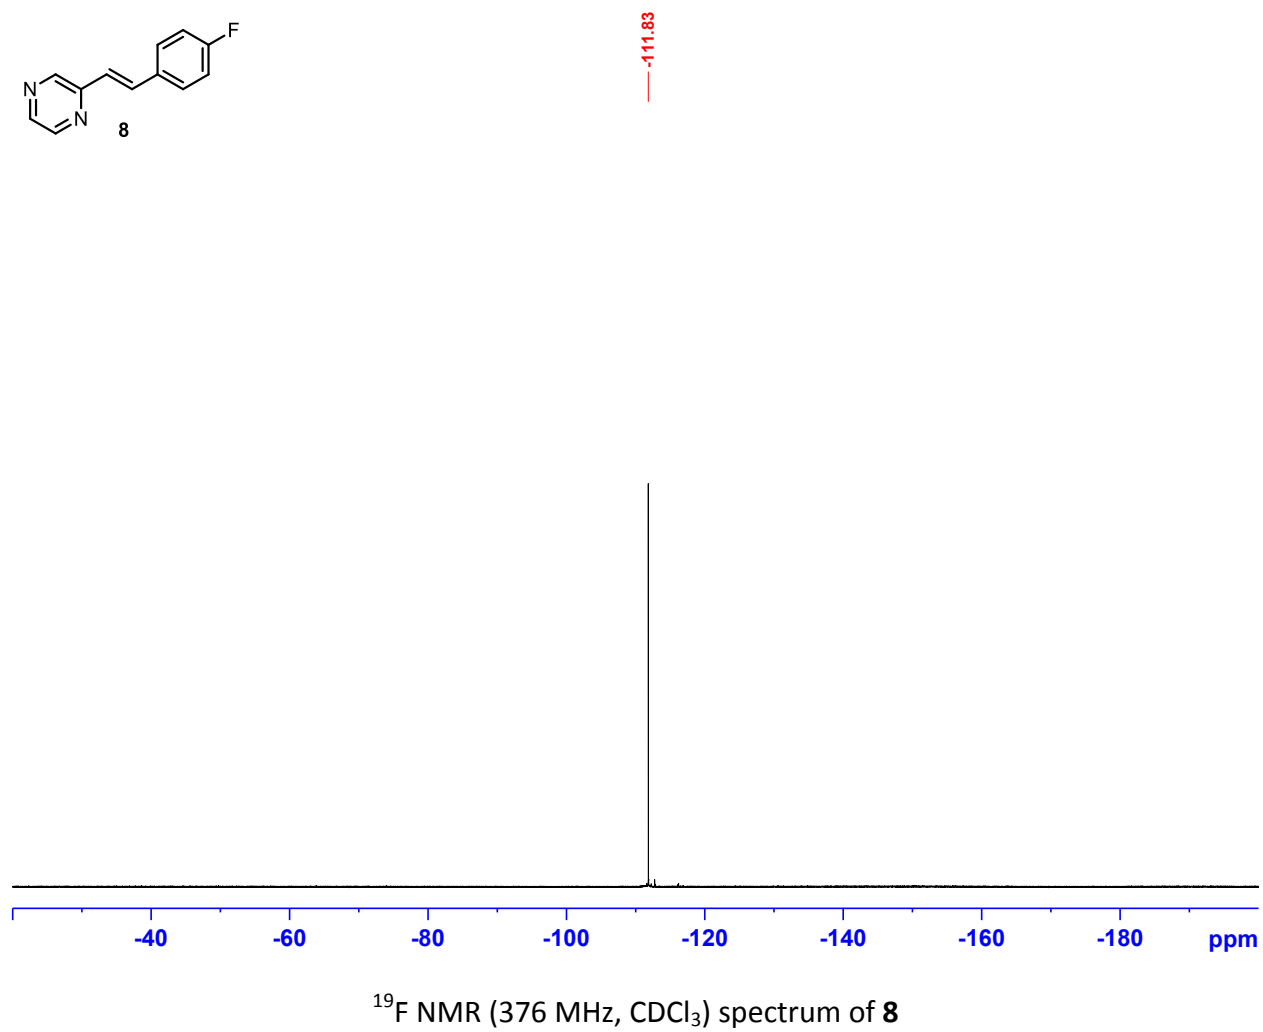

**(E)-Methyl 4-(9-phenyl carbazole)vinyl benzoate (10)**

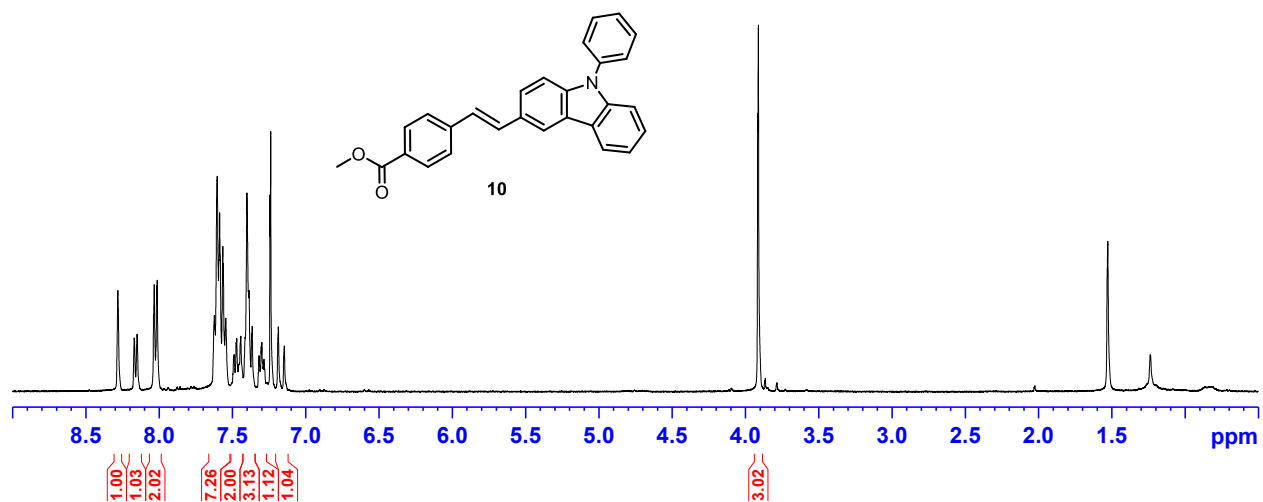

<sup>1</sup>H NMR (400 MHz, CDCl<sub>3</sub>) spectrum of **10**

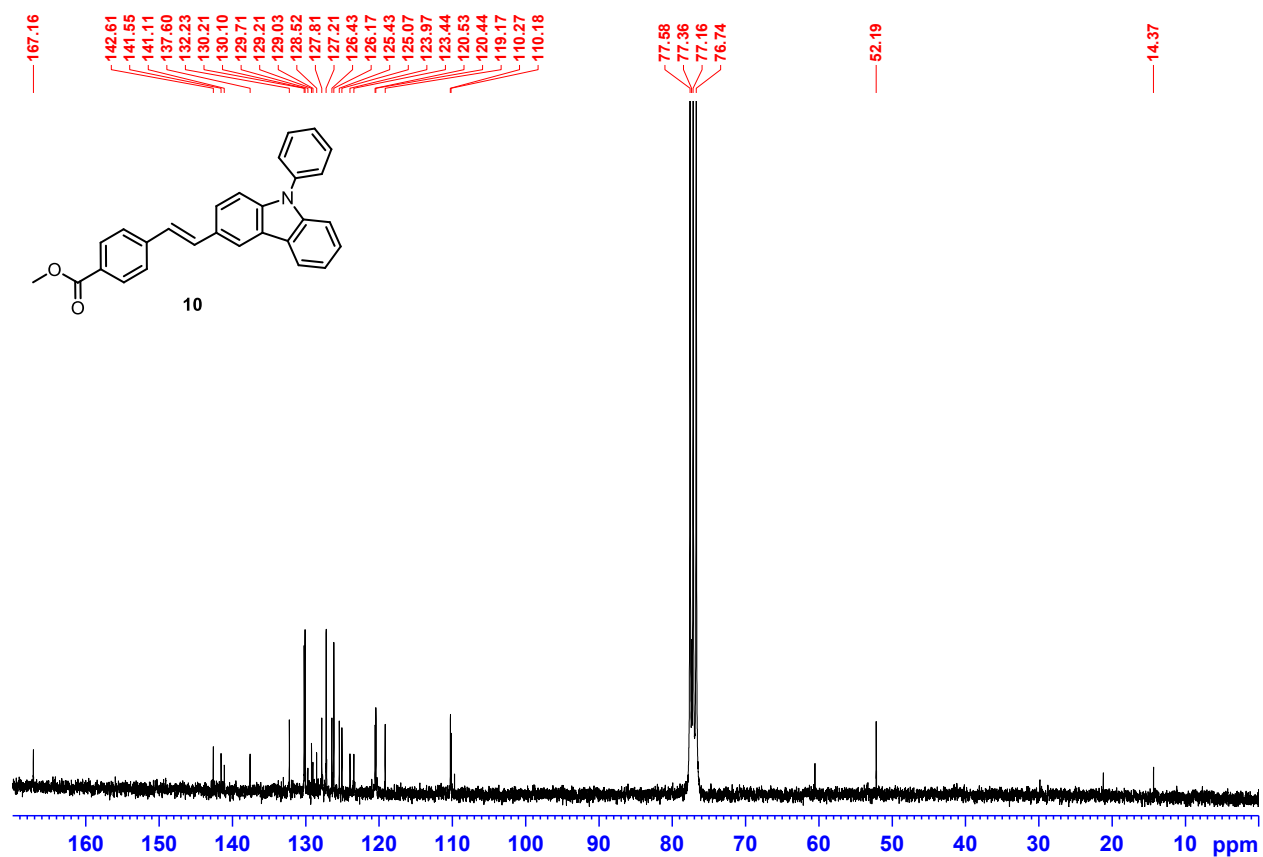

<sup>13</sup>C NMR (100 MHz, CDCl<sub>3</sub>) spectrum of **10**

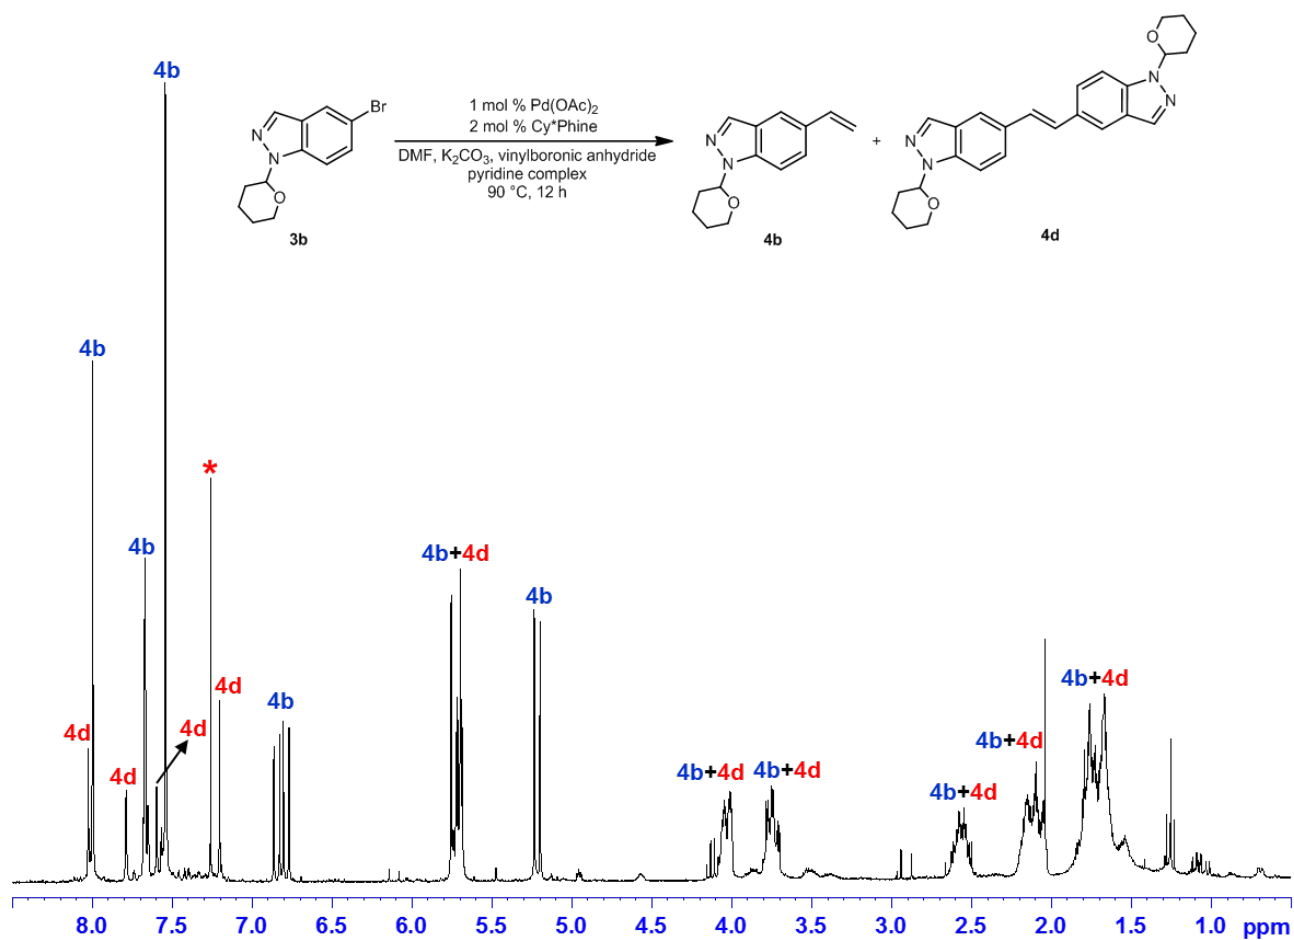

<sup>1</sup>H NMR (300 MHz, CDCl<sub>3</sub>) spectrum of mixture of Suzuki product and homocoupling byproduct

## References:

1. D. J. Slade, N. F. Pelz, W. Bodnar, J. W. Lampe and P. S. Watson, *J. Org. Chem.* 2009, **74**, 6331-6334.
2. C. I. Traficante, C. Fagundez, G. L. Serra, E. G. Mata and C. M. L. Delpiccolo, *ACS Comb. Sci.* 2016, **18**, 225–229.
